# Supplementary figures and images for: 3D printed fittings and fluidic modules for customizable droplet generators
Source: Royal Society of Chemistry journal article supplement (doi:10.1039/c8ra08686a), 2019-01-01

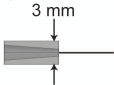

Needle (**N**)

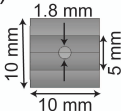

3D printed  
holder (**H**)

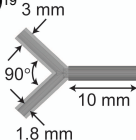

3D printed  
Y-fitting (**Y**)

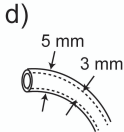

Tube (**T**)

Supplement: c8ra08686a2.pdf [file c8ra08686a2.pdf]
